# Supplementary material for: Controlled Release of the α-Tocopherol-Derived Metabolite α-13′-Carboxychromanol from Bacterial Nanocellulose Wound Cover Improves Wound Healing
Source: MDPI journal article supplement (doi:10.3390/nano11081939), 2021-07-28
Supplement: s1 [file s1]

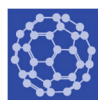

supplementary

# Controlled Release of the $\alpha$ -Tocopherol-Derived Metabolite $\alpha$ -13'-Carboxychromanol from Bacterial Nanocellulose Wound Cover Improves Wound Healing

Jessica Hoff<sup>1,2</sup>, Berit Karl<sup>3</sup>, Jana Gerstmeier<sup>4</sup>, Uwe Beekmann<sup>3</sup>, Lisa Schmölz<sup>5,6</sup>, Friedemann Börner<sup>4</sup>, Dana Kralisch<sup>3,7</sup>, Michael Bauer<sup>1,2,7</sup>, Oliver Werz<sup>4,7</sup>, Dagmar Fischer<sup>3,7,8</sup>, Stefan Lorkowski<sup>5,6,7,\*</sup> and Adrian T. Press<sup>1,2,9,\*</sup>

- <sup>1</sup> Department of Anesthesiology and Intensive Care Medicine, Jena University Hospital, Am Klinikum 1, 07747 Jena, Germany; jessica.hoff@med.uni-jena.de (J.H.); michael.bauer@med.uni-jena.de (M.B.)
- <sup>2</sup> Center for Sepsis Control and Care (CSCC), Jena University Hospital, Am Klinikum 1, 07747 Jena, Germany
- <sup>3</sup> Pharmaceutical Technology and Biopharmacy, Institute of Pharmacy, Friedrich Schiller University Jena, Lessingstraße 8, 07743 Jena, Germany; berit.karl@uni-jena.de (B.K.); beekmann@jenacell.de (U.B.); dana.kralisch@uni-jena.de (D.K.); dagmar.fischer@fau.de (D.F.)
- <sup>4</sup> Department of Pharmaceutical and Medicinal Chemistry, Institute of Pharmacy, Friedrich Schiller University Jena, Philosophenweg 14, 07743 Jena, Germany; jana.gerstmeier@uni-jena.de (J.G.); friedemann.boerner@uni-jena.de (F.B.); oliver.werz@uni-jena.de (O.W.)
- <sup>5</sup> Institut of Nutritional Sciences, Friedrich Schiller University Jena, Dornburger Straße 25, 07743 Jena, Germany; lisa.schmoelz@uni-jena.de
- <sup>6</sup> Competence Cluster for Nutrition and Cardiovascular Health (nutriCARD) Halle-Jena-Leipzig, Dornburger Straße 25, 07743 Jena, Germany
- <sup>7</sup> Jena Center for Soft Matter (JCSM), Friedrich Schiller University Jena, Philosophenweg 7, 07743 Jena, Germany
- <sup>8</sup> Department of Chemistry and Pharmacy, Division of Pharmaceutical Technology, Friedrich Alexander University Erlangen-Nürnberg, Cauerstrasse 4, 91058 Erlangen, Germany
- <sup>9</sup> Medical Faculty, Friedrich Schiller University Jena, Bachstr. 18, 07743 Jena, Germany
- \* Correspondence: stefan.lorkowski@uni-jena.de (S.L.); adrian.press@med.uni-jena.de (A.T.P.)

## Supplementary Figures

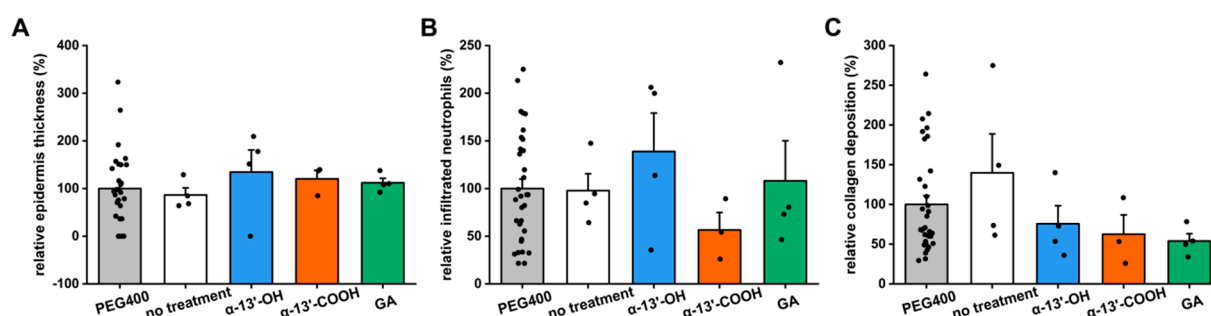

**Figure S1.** Histological analysis of wounds treated with low doses of tocopherol derivatives. (A) Relative epidermis thickness as measured and compared to vehicle-treated wounds. (B) Infiltrated neutrophils after 10 days. (C) Collagen deposition in the newly generated tissue was analyzed by second harmonic generation imaging as a measure of potential scar formation. Data are represented as mean bar plots with S.E. and individual data points. \*unpaired t-test compared to PEG400 control,  $p < 0.05$ .

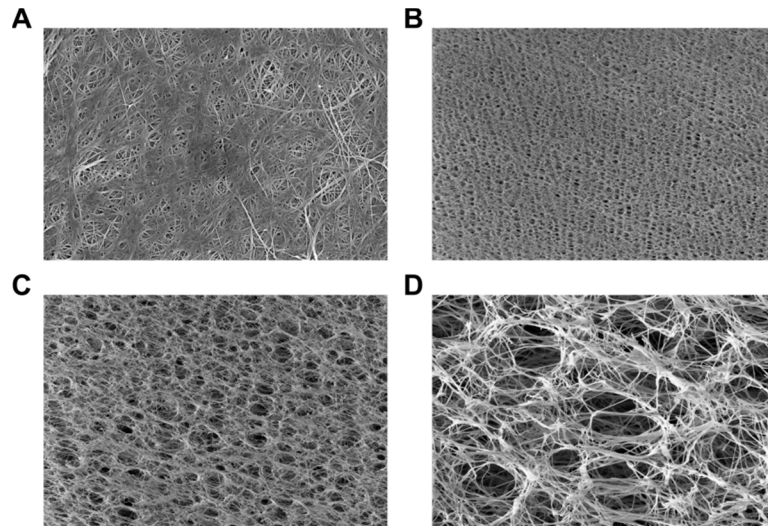

**Figure S2.** Representative pictures of the morphological structure of the native BNC network. Pictures are taken by scanning electron microscopy in different magnifications. Cross-sections of freeze-dried BNC samples were sputter-coated with gold before imaging. (A) Dense top layer. (B)-(D) Porous middle layer. Magnification: (A) 5000x, (B) 300x, (C) 100x and (D) 5000x.

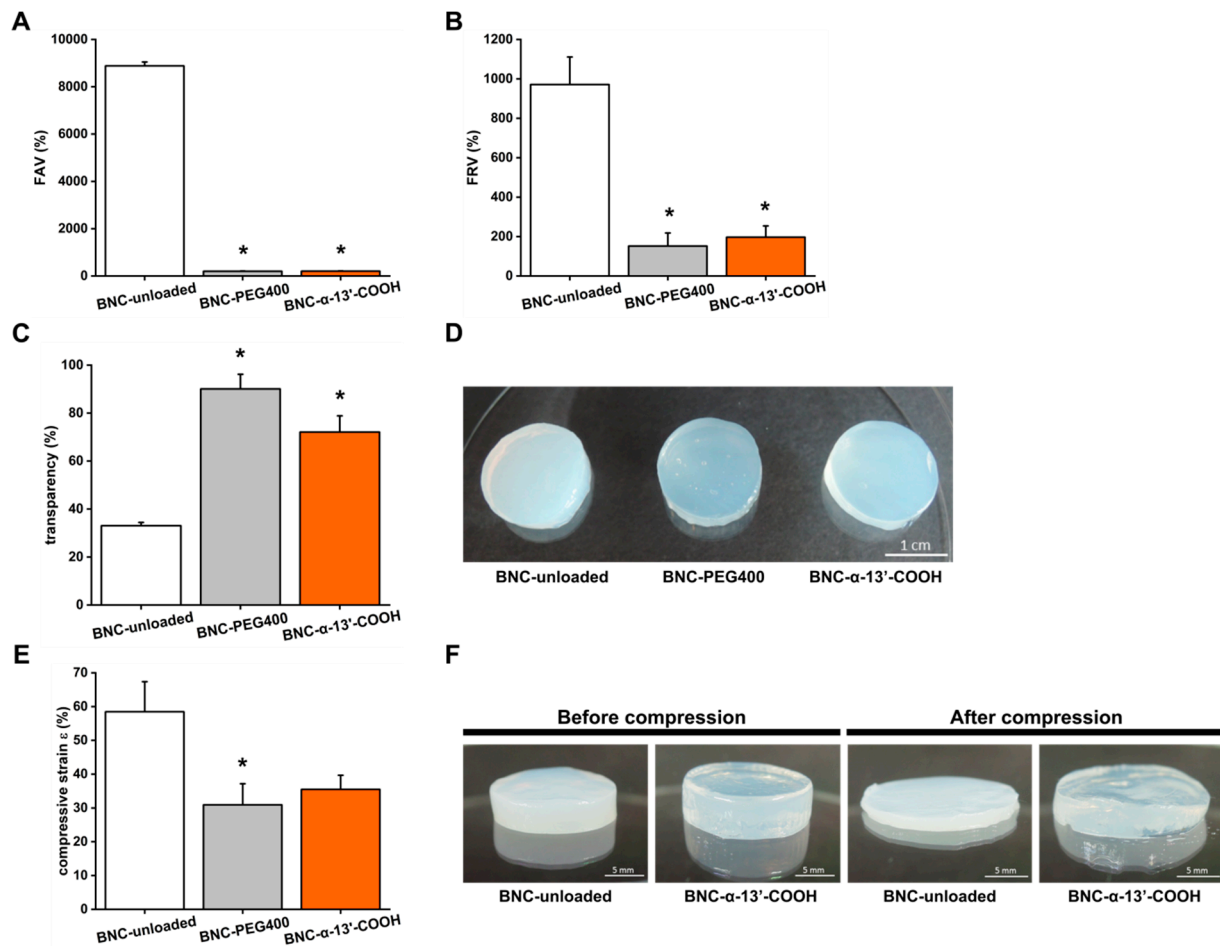

**Figure S3.** Physicochemical characterization of the bacterial nanocellulose (BNC). (A) Fluid absorption value (FAV) calculated by the weight of BNC determined before and after drying at 50 °C until constant mass. Comparison of the FAV of unloaded BNC, BNC loaded with PEG400 (BNC-PEG400), and BNC loaded with  $\alpha$ -13'-hydroxychromanol ( $\alpha$ -13'-COOH) dissolved in PEG400 (BNC- $\alpha$ -13'-COOH) (n = 2 in triplicates). (B) Fluid retention value (F.R.V.) calculated by the weight of BNC determined before and after centrifugation at 1073 g for 15 min and drying at 50 °C until constancy of mass of unloaded BNC compared to BNC loaded with PEG400 and BNC loaded with  $\alpha$ -13'-COOH (n = 2 in triplicates). (C) Absorption measurement at 600 nm to show BNC transparency after incorporating PEG400 and  $\alpha$ -13'-COOH dissolved in

PEG400 compared to unloaded BNC ( $n = 2$  in quintuplicates). (D) Plan views of BNC samples visualizing increased transparency. (E) Compressive strain ( $\epsilon$ ) of unloaded BNC samples in comparison to samples loaded for 48 h with PEG400 or a solution of  $\alpha$ -13'-COOH dissolved in PEG400. Each fleece was burdened with a weight of 400 g for 10 min ( $n = 2$  in quadruplicates). (F) Compression stability of BNC samples loaded with  $0.16 \mu\text{g mL}^{-1}$   $\alpha$ -13'-COOH dissolved in PEG400 in comparison to unloaded BNC (BNC-unloaded) sample. Both fleeces were compressed with 400 g for 10 min. Data are represented as mean bar plots with S.E. and individual data points. \*unpaired t-test compared to unloaded control,  $p < 0.05$ .

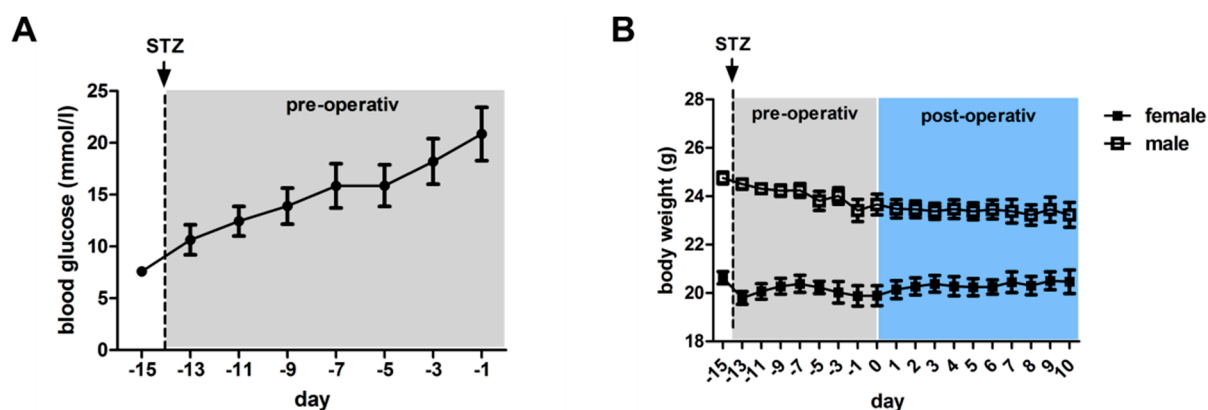

**Figure S4.** Analysis of blood glucose concentration and body weight after streptozotocin (STZ) injection. (A) Blood glucose and (B) body weight development pre-and post-operative. Wound healing was assessed in the splinted wound model over 10 days.  $n = 16$ , mean  $\pm$  S.E.

## Supplementary Tables

**Table S1.** Weight and blood glucose concentrations. (n = 16, mean  $\pm$  S.E.).

| day                                        | 0              | 2              | 4              | 6              | 8              | 10             | 12             | 14              |
|--------------------------------------------|----------------|----------------|----------------|----------------|----------------|----------------|----------------|-----------------|
| <b>body weight (g)</b>                     | 23.2 $\pm$ 2.2 | 22.7 $\pm$ 2.4 | 22.7 $\pm$ 2.2 | 22.7 $\pm$ 2.1 | 22.7 $\pm$ 2.1 | 22.3 $\pm$ 2.0 | 22.4 $\pm$ 2.2 | 22.0 $\pm$ 2.1  |
| <b>blood glucose (mmol L<sup>-1</sup>)</b> | 7.6 $\pm$ 0.8  | 10.6 $\pm$ 5.8 | 12.4 $\pm$ 5.7 | 13.9 $\pm$ 7.0 | 15.9 $\pm$ 8.5 | 15.9 $\pm$ 8.1 | 18.2 $\pm$ 8.8 | 20.9 $\pm$ 10.3 |

**Table S2.** Used RT-qPCR primers. In each case, forward and reverse primers are located in different exons.

| gene symbol   | gene name                               | GenBank                   | forward primer (from 5' to 3') | reverse primer (from 5' to 3') | product size [bp] |
|---------------|-----------------------------------------|---------------------------|--------------------------------|--------------------------------|-------------------|
| <b>COL1A1</b> | Collagen 1A1                            | NM_000088                 | TACAGCGTCAC-TGTCGATGGC         | TCAATCACTGTCTT-GCCCCAG         | 61                |
| <b>MMP2</b>   | Matrix metalloproteinase-2              | NM_004530<br>NM_001127891 | ATTTGATGG-CATCGCTCAGATC        | TCACGTGGCGTCACAGTCC            | 81                |
| <b>TIMP1</b>  | tissue inhibitor of metalloproteinase 1 | NM_003254                 | GATCCAGCGCCCAGAGA-GAC          | GCTATCAGCCACAG-CAACAACAG       | 91                |
| <b>TIMP2</b>  | tissue inhibitor of metalloproteinase 2 | NM_003255                 | GAGTTTATCTACAC-GGCCCCCTC       | CACTCG-CAGCCCATCTGGTA          | 203               |
| <b>TIMP3</b>  | tissue inhibitor of metalloproteinase 3 | NM_000362                 | TCGGCACGCTGGTCTACAC            | GCTGGTCCCACCTCTCCAC            | 210               |

---

## Supplementary Methods

### Scanning electron microscopy

For evaluation and characterization of the BNC network structure, BNC samples were freeze-dried by lyophilization at  $-80^{\circ}\text{C}$  and 0.01 mbar for 72 h using the freeze dryer Alpha 2–4 L.D. plus (Martin Christ Gefriertrocknungsanlagen, Osterode am Harz, Germany). Hereinafter, pictures of BNC cross-sections were taken by scanning electron microscopy with the help of a Leica S440i scanning electron microscope (Leica Microsystems, Wetzlar, Germany).

### Fluid binding capacity

Fluid absorption value (FAV) and fluid retention value (FRV) were examined for unloaded (BNC-unloaded), BNC-PEG400, and drug ( $\alpha$ -13'-COOH dissolved in PEG400) loaded BNC (BNC-COOH) samples. Fleeces were cut into four equally sized pieces and re-swollen in loading solution for 2 h. Weight ( $W_i$ ) and dimension were determined by drying at  $50^{\circ}\text{C}$  in a drying cabinet (W.T.C. Binder, Tuttlingen, Germany) until constancy of mass. Samples were weighed again ( $W_d$ ), and FAV was calculated with the following equation:

$$FAV = W_i/W_d * 100\%$$

Data for FRV were received by slicing two equally sized pieces of the BNC fleeces followed by incubation for 2 h in loading solution. After centrifugation at 1073 g for 15 min, drying was performed in a drying cabinet (W.T.C. Binder, Tuttlingen, Germany) at  $50^{\circ}\text{C}$  until constancy of mass. The weight and dimensions of the BNC pieces were determined before and after drying. FRV was calculated according to the equation:

$$FRV = (W_i - W_d/W_d) * 100\%$$

$W_i$  represents the weight of the dry BNC fleece, and  $W_d$  represents the weight after centrifugation.

### Measurement of transparency

Samples with comparable heights were selected. They were measured in 24-well plates (Greiner bio-one, Frickenhausen, Germany) by spectrophotometry in the plate reader Tecan Spark 10 M (Tecan Austria, Grödig, Austria) at 600 nm [1]. The mean absorption of the samples was shown relatively to maximum absorption.

### Mechanical stability

BNC samples were characterized regarding their height and weight at room temperature, as described in previous sections. A weight of 400 g was placed on the BNC fleeces for 10 minutes. After removal, height and weight determination were performed again to calculate compressive strain  $\varepsilon$  and weight reduction. The following equation evaluated the compressive strain  $\varepsilon$ :

$$\varepsilon = \Delta h/h_0 * 100\%$$

$\Delta h$  and the height of BNC show the change of height before compression by  $h_0$  (mm). The calculation of weight reduction was conducted according to the formula:

$$m_{\text{loss}} = \Delta m/m_0 * 100\%$$

$\Delta m$  represents mass changes due to compression, and  $m_0$  represents mass before compression.

## References

1. Gutiérrez, T.J.; Alvarez, V.A. Data on physicochemical properties of active films derived from plantain flour/PCL blends developed under reactive extrusion conditions. *Data Brief* **2017**, *15*, 445–448, doi:10.1016/j.dib.2017.09.071.
