# Supplementary material for: Controlled Release of the α-Tocopherol-Derived Metabolite α-13′-Carboxychromanol from Bacterial Nanocellulose Wound Cover Improves Wound Healing
Source: Nanomaterials (Basel). 2021 Jul 28;11(8):1939. doi: 10.3390/nano11081939 (PMC8398652; doi:10.3390/nano11081939)
Supplement: Supplementary file 1 [file nanomaterials-11-01939-s001.zip › Hoff_Wundheilung_Datensammlung.xlsx]

## Sheet: Figure_1
	all values in %
Abb. 1 B-E	Vehikel
	Animal-ID	60433	60434	60436	60437	60438	60439	60440	60442	60443	60444	60445	60446	60447	60448	60449	60450	60451	60452	60453	60454	60458	60459	60460	60461	60496	60497	60462	60463	60464	40501	60502	60503	60504	60498	60499	60441	61333	61337	61338	61339	mean	SD	SE
	day 0	100	100	100	100	100	100	100	100	100	100	100	100	100	100	100	100	100	100	100	100	100	100	100	100	100	100	100	100	100	100	100	100	100	100	100	100	100	100	100	100	100	2.27556e-15	3.59797e-16
	day 1	75.969	99.187	85.8086	108.642	96.2121	96.9072	107.752	76.4912	73.0496	84.7059	75.5102	88.0952	88.6525	52.8986	101.587	66.6667	67.3913	79.4326	70.8772	76.6355	96.4539	88.4488	79.6117	77.551	82.0513	101.55	77.305	82.5758	101.408	83.7209	64.6048	68.5714	84.127	69.4444	80.7843	94.697	78.7671	75.974	91.2409	77.4834	83.2211	12.5921	1.99098
	day 2	74.4186	86.9919	87.7888	80.6584	88.6364	39.1753	86.8217	68.7719	73.0496	93.3333	80.2721	92.8571	85.8156	65.942	95.2381	75	63.7681	75.1773	65.9649	74.1433	89.3617	83.8284	76.3754	76.1905	82.0513	96.124	80.1418	81.8182	73.2394	88.3721	63.2302	71.746	71.4286	70.8333	75.2941	78.7879	76.7123	75.974	86.8613	71.5232	78.093	10.7385	1.69791
	day 3	103.101	86.1789	67.3267	85.5967	71.2121	59.1065	81.3953	68.0702	67.3759	88.6275	71.4286	90.4762	76.5957	71.7391	91.2698	70.4545	57.2464	68.7943	65.9649	65.4206	80.1418	82.5083	77.6699	76.1905	83.5165	93.7984	68.0851	73.4848	75.1174	77.5194	63.2302	58.4127	80.1587	70.1389	67.451	74.2424	69.1781	72.0779	79.562	80.1325	75.2499	10.0584	1.59038
	day 4	87.5969	81.3008	77.8878	91.358	69.697	55.6701	85.2713	66.6667	60.9929	88.6275	70.068	86.5079	78.7234	63.7681	85.7143	69.697	44.9275	70.922	68.0702	64.1745	73.0496	73.2673	73.7864	71.4286	77.6557	89.9225	65.0355	70.4545	78.8732	66.6667	60.4811	59.0476	73.0159	64.5833	58.0392	68.9394	73.9726	71.4286	90.5109	82.1192	72.748	10.6438	1.68293
	day 5	86.8217	74.7967	80.5281	93.8272	66.6667	61.1684	84.4961	58.2456	62.4113	77.6471	70.068	82.5397	75.1773	50.7246	71.4286	70.4545	43.4783	62.4113	65.2632	61.6822	65.9574	59.4059	71.8447	66.6667	73.2601	86.8217	65.9574	70.4545	64.7887	63.5659	63.9175	55.873	61.9048	61.8056	59.6078	59.0909	69.1781	69.4805	90.5109	85.4305	69.134	10.9735	1.73506
	day 6	77.5194	71.5447	74.5875	95.4733	66.6667	61.1684	82.9457	66.6667	65.9574	72.1569	65.9864	80.1587	73.7589	48.5507	69.0476	59.8485	44.2029	68.0851	57.5439	50.4673	65.2482	56.1056	57.6052	66.6667	76.1905	82.9457	60.2837	70.4545	62.9108	58.1395	58.4192	55.873	52.381	52.7778	60.3922	59.0909	61.6438	51.2987	89.781	78.1457	65.7173	11.4224	1.80604
	day 7	65.8915	63.4146	72.6073	88.8889	64.3939	58.4192	69.7674	72.2807	62.4113	69.8039	58.5034	69.8413	78.0142	50	68.254	55.303	31.8841	60.9929	49.8246	44.8598	72.3404	50.8251	51.1327	66.6667	67.3993	68.2171	63.1206	64.3939	0	58.1395	53.6082	54.6032	0	46.5278	54.902	0	59.589	69.4805	86.8613	67.5497	57.7678	19.8771	3.14285
	day 8	58.9147	57.7236	64.0264	78.1893	50	55.6701	69.7674	65.2632	64.3972	65.8824	58.5034	64.2857	73.7589	36.2319	58.7302	40.9091	0	58.8652	44.9123	46.1059	68.0851	48.8449	48.5437	52.381	68.1319	45.7364	61.7021	62.8788	0	204.651	53.6082	53.9683	0	0	47.8431	0	55.4795	57.7922	83.9416	62.2517	54.6994	32.6208	5.15781
	day 9	55.0388	45.5285	53.4653	80.6584	40.1515	0	57.3643	64.5614	55.3191	48.6275	41.8367	40.4762	69.1489	0	57.1429	37.1212	0	56.7376	46.3158	38.3178	42.5532	41.5842	42.7184	38.7755	65.2015	45.7364	60.2837	60.6061	0	45.3488	44.3299	51.4286	0	0	46.2745	0	0	42.2078	74.4526	40.3974	40.7428	22.9227	3.6244
	day 10	0	0	48.1848	75.7202	0	0	54.2636	47.0175	53.1915	47.0588	0	0	52.4823	0	34.127	0	0	68.7943	55.4386	43.6137	50.3546	46.2046	45.9547	43.5374	56.4103	53.4884	56.0284	56.8182	0	45.7364	46.7354	54.6032	0	0	44.7059	0	0	25.974	63.5036	0	31.7487	26.1232	4.13044
Abb. 1 B	ohne Behandlung
	Animal-ID	60433	60452	60447	60462	61324	61325	61326	61334	mean	SD	SE
	day 0	100	100	100	100	100	100	100	100	100	0	0
	day 1	67.3611	78.3505	91.8699	81.0997	67.0391	82.069	93.2836	82.5397	80.4516	9.69613	3.4281
	day 2	71.5278	77.6632	87.8049	73.5395	68.1564	72.4138	85.0746	85.7143	77.7368	7.51325	2.65634
	day 3	45.1389	70.1031	84.5528	70.1031	60.8939	75.1724	78.3582	84.127	71.0562	13.0934	4.62922
	day 4	37.5	70.7904	79.6748	73.5395	60.8939	75.1724	79.1045	79.3651	69.5051	14.3493	5.07324
	day 5	31.9444	71.4777	78.8618	69.4158	58.1006	74.4828	63.4328	73.0159	65.0915	14.8826	5.2618
	day 6	27.7778	68.0412	80.4878	63.9175	64.2458	71.0345	63.4328	75.3968	64.2918	15.9432	5.63679
	day 7	24.3056	70.1031	77.2358	57.732	63.6872	70.3448	33.5821	74.6032	58.9492	19.6444	6.94534
	day 8	0	65.9794	65.8537	47.4227	65.3631	59.3103	0	0	37.9911	32.032	11.325
	day 9	0	59.7938	50.4065	47.4227	50.2793	47.5862	0	0	31.9361	26.7213	9.4474
	day 10	0	68.0412	0	42.6117	47.486	0	0	0	19.7674	28.2193	9.97703
Abb. 1 C	OH (1 µM)									OH (10 µM)
	Animal-ID	60434	60436	60437	60438	mean	SD	SE		Animal-ID	60439	60440	60442	60441	mean	SD	SE
days	day 0	100	100	100	100	100	0	0		day 0	100	100	100	100	100	0	0
	day 1	82.0513	101.626	88.6525	104.418	94.1869	10.6131	5.30654		day 1	91.1111	102.008	104.444	82.7839	95.0869	10.0439	5.02193
	day 2	73.2601	99.187	80.1418	77.1084	82.4243	11.5245	5.76223		day 2	91.8519	99.5984	78.5185	81.3187	87.8219	9.72576	4.86288
	day 3	73.2601	78.8618	73.0496	78.7149	75.9716	3.25417	1.62708		day 3	72.5926	89.1566	83.7037	80.5861	81.5098	6.91995	3.45997
	day 4	66.6667	94.3089	62.4113	75.502	74.7222	14.1504	7.07518		day 4	72.5926	85.9438	79.2593	73.9927	77.9471	6.05466	3.02733
	day 5	69.9634	91.8699	60.2837	79.5181	75.4088	13.4942	6.74708		day 5	74.8148	92.3695	69.6296	67.3993	76.0533	11.3123	5.65617
	day 6	64.4689	93.4959	70.2128	73.0924	75.3175	12.638	6.31901		day 6	65.1852	84.3373	65.9259	63.0037	69.613	9.89427	4.94714
	day 7	56.4103	84.5528	72.3404	65.8635	69.7917	11.8164	5.9082		day 7	63.7037	85.1406	60.7407	65.2015	68.6966	11.1182	5.55911
	day 8	54.2125	86.1789	55.3191	66.6667	65.5943	14.8324	7.41619		day 8	62.2222	83.5341	53.3333	66.6667	66.4391	12.6733	6.33663
	day 9	49.8168	76.4228	49.6454	61.0442	59.2323	12.6406	6.3203		day 9	57.7778	62.6506	40	64.4689	56.2243	11.179	5.58951
	day 10	40.293	75.2846	0	0	28.8944	36.2939	18.147		day 10	52.5926	58.6345	24.4444	60.0733	48.9362	16.6464	8.3232
Abb. 1 D	COOH (1 µM)									COOH (5 µM)
	Animal-ID	60443	60444	60445	60448	mean	SD	SE		Animal-ID	60446	60499	60450	60451	60133	61337	61338	61324	mean	SD	SE
	day 0	100	100	100	100	100	0	0		day 0	100	100	100	100	100	100	100	100	100	0	0
	day 1	81.6479	88.8889	60.9929	89.7119	80.3104	13.3783	6.68913		day 1	99.5305	82.2695	63.9175	78.0488	88.5496	86.4	76	65.3333	80.0062	11.9176	4.21352
	day 2	73.4082	77.3946	68.0851	79.0123	74.4751	4.8676	2.4338		day 2	94.8357	69.5035	68.0412	78.0488	92.3664	77.6	70.6667	67.3333	77.2995	10.8562	3.83823
	day 3	70.412	81.2261	70.2128	69.1358	72.7467	5.68066	2.84033		day 3	58.216	63.8298	67.354	72.3577	83.9695	67.2	60.6667	68	67.6992	7.93944	2.80702
	day 4	60.6742	75.0958	63.1206	62.5514	65.3605	6.57383	3.28691		day 4	89.2019	39.7163	64.6048	68.2927	84.7328	57.6	63.3333	56	65.4352	15.8673	5.60994
	day 5	60.6742	67.433	64.539	50.2058	60.713	7.53215	3.76607		day 5	75.1174	55.3191	57.0447	63.4146	66.4122	51.2	62.6667	54.6667	60.7302	7.75229	2.74085
	day 6	57.6779	65.1341	64.539	46.9136	58.5661	8.47318	4.23659		day 6	69.4836	46.8085	46.7354	65.8537	74.8092	42.4	52.6667	46.6667	55.678	12.4519	4.40242
	day 7	53.9326	62.069	54.6099	47.7366	54.587	5.86902	2.93451		day 7	61.9718	41.844	44.6735	50.4065	64.1221	0	0	0	32.8772	28.2648	9.99313
	day 8	41.9476	54.4061	55.3191	46.5844	49.5643	6.41499	3.20749		day 8	59.1549	38.2979	27.4914	43.9024	61.8321	0	0	0	28.8348	26.243	9.27829
	day 9	0	46.7433	45.3901	0	23.0333	26.6023	13.3012		day 9	0	0	0	0	37.4046	0	0	0	4.67557	13.2245	4.67557
	day 10	0	45.977	0	0	11.4943	22.9885	11.4943		day 10	0	0	0	0	0	0	0	0	0	0	0
Abb. 1 E	GA (1 µM)									GA (10 µM)
	Animal-ID	60453	60454	60458	60448	mean	SD	SE		Animal-ID	60459	60460	60461	60450	mean	SD	SE
	day 0	100	100	100	100	100	0	0		day 0	100	100	100	100	100	0	0
	day 1	77.6471	65.9649	92.3077	77.5194	78.3598	10.7918	5.39592		day 1	74.552	75.9857	64.3678	86.0215	75.2317	8.85954	4.42977
	day 2	77.6471	66.6667	79.1209	76.7442	75.0447	5.6706	2.8353		day 2	77.4194	67.5986	68.9655	72.4014	71.5962	4.37642	2.18821
	day 3	83.9216	61.0526	73.2601	75.1938	73.357	9.42321	4.71161		day 3	76.7025	68.8172	73.5632	71.6846	72.6919	3.31019	1.6551
	day 4	83.1373	58.9474	63.0037	73.6434	69.6829	10.9021	5.45106		day 4	73.1183	55.1971	61.3027	70.2509	64.9672	8.23085	4.11542
	day 5	75.2941	57.5439	58.6081	59.6899	62.784	8.38598	4.19299		day 5	65.233	54.4803	53.6398	65.9498	59.8257	6.67287	3.33644
	day 6	73.7255	58.9474	57.1429	52.7132	60.6322	9.11335	4.55667		day 6	60.9319	48.7455	52.1073	62.3656	56.0376	6.6488	3.3244
	day 7	72.1569	57.5439	51.2821	48.8372	57.455	10.4646	5.23231		day 7	57.3477	0	38.3142	64.5161	40.0445	28.8953	14.4477
	day 8	57.2549	55.4386	47.619	50.9302	52.8107	4.36448	2.18224		day 8	54.4803	0	0	40.8602	23.8351	28.0785	14.0392
	day 9	50.1961	47.0175	0	47.2868	36.1251	24.1264	12.0632		day 9	38.7097	0	0	43.0108	20.4301	23.6559	11.828
	day 10	53.3333	30.8772	0	44.9612	32.2929	23.438	11.719		day 10	36.5591	0	0	49.4624	21.5054	25.3848	12.6924

## Sheet: Figure_2
	all values in %
Abb. 2 B	Vehicle				naive (no treatment)				OH (1 µM)				COOH (1 µM)				GA (1 µM)
Abbb. S1 A	wound	Animal-ID	%		wound	Animal-ID	%		wound	Animal-ID	%		wound	Animal-ID	%		wound	Animal-ID	%
	right	433	n.d.		left	433	84.7867		right	434	113.782		right	443	89.251		right	453	232.261
	left	434	182.155		right	447	94.55		right	436	206.164		right	444	54.2813		right	454	80.3781
	left	436	141.966		right	462	64.2323		right	437	199.901		right	445	n.d.		right	458	46.4522
	left	437	143.532		right	452	147.477		right	438	35.4916		right	448	26.0968		right	496	73.071
	left	438	93.4264		right	334	57.5522			mean	138.835			mean	56.543			mean	108.041
	left	439	138.313		right	324	51.3859			SD	80.7669			SD	31.6378			SD	84.0872
	left	440	47.4961		right	325	39.5671			SE	40.3834			SE	18.2661			SE	42.0436
	left	441	33.4039		right	326	107.396
	left	442	183.721			mean	80.8685
	left	443	21.9213			SD	35.332
	left	444	94.9922			SE	12.4918		OH (10 µM)				COOH (5 µM)				GA (10 µM)
	left	445	81.4219						wound	Animal-ID	%		wound	Animal-ID	%		wound	Animal-ID	%
	left	446	83.5097						right	439	28.1845		right	446	54.2813		right	459	41.7548
	left	447	153.971						right	440	169.629		right	449	13.5703		right	460	n.d.
	left	448	n.d.						right	441	64.1981		right	450	24.009		right	461	16.18
	left	449	63.6761						right	442	252.095		right	451	n.d.		right	497	135.703
	left	450	67.3297							mean	128.527		right	333	49.5839			mean	64.546
	left	451	32.8819							SD	101.924		right	337	105.953			SD	62.9367
	left	452	228.608							SE	50.9618		right	338	279.235			SE	36.3365
	left	453	216.603										right	339	73.5929
	left	454	156.059											mean	85.7465
	left	458	113.26											SD	90.6575
	left	459	67.3297											SE	32.0523
	left	460	n.d.
	left	461	33.9258
	left	462	163.888
	left	463	121.611
	left	464	31.8381
	left	496	100.734
	left	497	94.9922
	left	498	89.7729
	left	499	64.72
	left	501	21.9213
	left	502	181.112
	left	503	56.369
	left	504	45.4084
	left	333	94.4703
	left	337	70.9832
	left	338	69.9393
	left	339	112.738
		mean	100
		SD	55.6816
		SE	9.69292
Abb. 2 C	Vehicle				naive (no treatment)				OH (1 µM)				COOH (1 µM)				GA (1 µM)
Abbb. S1 B	wound	Animal-ID	%		wound	Animal-ID	%		wound	Animal-ID	%		wound	Animal-ID	%		wound	Animal-ID	%
	right	433	63.6831		left	433	63.6831		right	434	209.245		right	443	n.d.		right	453	137.677
	left	434	149.201		right	447	128.579		right	436	0		right	444	84.9109		right	454	107.958
	left	436	322.055		right	462	84.3044		right	437	151.627		right	445	139.496		right	458	92.1889
	left	437	75.2068		right	452	67.9287		right	438	177.706		right	448	137.07		right	496	110.384
	left	438	n.d.		right	334	111.597			mean	134.644			mean	120.493			mean	112.052
	left	439	70.3547		right	324	124.94			SD	92.8027			SD	30.8385			SD	18.892
	left	440	0		right	325	146.168			SE	46.4014			SE	17.8046			SE	9.44598
	left	441	97.041		right	326	101.287
	left	442	0			mean	103.561
	left	443	156.479			SD	29.7581
	left	444	78.2393			SE	10.5211		OH (10 µM)				COOH (5 µM)				GA (10 µM)
	left	445	n.d.						wound	Animal-ID	%		wound	Animal-ID	%		wound	Animal-ID	%
	left	446	n.d.						right	439	70.3547		right	446	33.9643		right	459	82.4848
	left	447	0						right	440	335.398		right	449	165.576		right	460	n.d.
	left	448	n.d.						right	441	225.014		right	450	180.739		right	461	128.579
	left	449	0						right	442	266.863		right	451	175.28		right	497	86.1239
	left	450	263.224							mean	224.407		right	333	194.688			mean	99.0627
	left	451	0							SD	112.33		right	337	85.5174			SD	25.6268
	left	452	97.6475							SE	56.1649		right	338	175.28			SE	14.7957
	left	453	93.4019										right	339	285.664
	left	454	149.201											mean	162.089
	left	458	n.d.											SD	74.9483
	left	459	107.958											SE	26.4982
	left	460	n.d.
	left	461	86.7304
	left	462	115.843
	left	463	110.384
	left	464	150.414
	left	496	191.049
	left	497	36.3904
	left	498	91.5824
	left	499	36.3904
	left	501	141.316
	left	502	41.8489
	left	503	n.d.
	left	504	162.544
	left	333	77.0263
	left	337	138.89
	left	338	0
	left	339	195.901
		mean	100
		SD	76.4763
		SE	13.3128
Abb. 2 D	Vehicle				naive (no treatment)				OH (1 µM)				COOH (1 µM)				GA (1 µM)
Abbb. S1 C	wound	Animal-ID	%		wound	Animal-ID	%		wound	Animal-ID	%		wound	Animal-ID	%		wound	Animal-ID	%
	right	433	205.264		left	433	155.948		right	434	146.359		right	443	85.6587		right	453	56.3876
	left	434	194.085		right	447	287.204		right	436	76.1025		right	444	93.5668		right	454	52.0483
	left	436	190.618		right	462	64.023		right	437	55.864		right	445	n.d.		right	458	35.5214
	left	437	128.234		right	452	76.7818		right	438	37.6139		right	448	73.2924		right	496	81.7368
	left	438	n.d.		right	334	64.4914			mean	78.9848			mean	83.4296			mean	56.4235
	left	439	275.973		right	324	44.7049			SD	47.5874			SD	14.3362			SD	19.1207
	left	440	98.5902		right	325	100.595			SE	23.7937			SE	8.277			SE	9.56036
	left	441	73.9916		right	326	141.331
	left	442	200.371			mean	116.885
	left	443	62.6974			SD	79.0615
	left	444	52.7838			SE	27.9524		OH (10 µM)				COOH (5 µM)				GA (10 µM)
	left	445	48.3505						wound	Animal-ID	%		wound	Animal-ID	%		wound	Animal-ID	%
	left	446	89.0508						right	439	60.89		right	446	n.d.		right	459	19.3588
	left	447	148.591						right	440	52.5121		right	449	n.d.		right	460	9.83152
	left	448	n.d.						right	441	52.835		right	450	52.0148		right	461	81.3419
	left	449	71.3142						right	442	47.3528		right	451	73.2924		right	497	64.9444
	left	450	53.0441							mean	53.3975		right	333	66.4028			mean	43.8691
	left	451	n.d.							SD	5.59094		right	337	81.4976			SD	34.678
	left	452	70.5871							SE	2.79547		right	338	38.6058			SE	20.0214
	left	453	40.6007										right	339	83.5459
	left	454	102.94											mean	65.8932
	left	458	32.9794											SD	17.5917
	left	459	64.876											SE	6.21959
	left	460	114.843
	left	461	44.798
	left	462	95.185
	left	463	30.7568
	left	464	216.985
	left	496	66.6697
	left	497	137.598
	left	498	51.1386
	left	499	224.026
	left	501	68.9007
	left	502	62.9155
	left	503	55.819
	left	504	73.384
	left	333	117.447
	left	337	38.1377
	left	338	67.2775
	left	339	29.1769
		mean	100
		SD	64.522
		SE	11.2318
Abb. 2 E
								50 mg skin
	samples	72414	72415	72416	72428	72429	72431	72414	72415	72416	72428	72429	72431	mean	SD	SE
	PDX 1	26.1119	27.632	26.8599	71.4471	50.9139	31.6312	22.706	24.0278	23.3564	62.128	44.273	27.5054	33.9994	15.9949	6.52989
	RvD5	34.014	26.9057	23.3464	34.1507	31.3672	46.506	29.5774	23.3962	20.3012	29.6962	27.2759	40.44	28.4478	6.92683	2.82787
	MaR1 2	3.61894	4.48333	2.52693	12.6974	4.87664	1.99581	3.1469	3.89855	2.19733	11.0412	4.24056	1.73549	4.37667	3.40295	1.38925
	PGE2 EicoPAF	2160.24	2906.5	2327.15	5357.43	1355.51	1570.84	1878.47	2527.39	2023.61	4658.63	1178.7	1365.95	2272.13	1264.44	516.205
	PGD2	4845.8	6195.96	4072.09	11249.4	4145.04	5746.61	4213.74	5387.79	3540.95	9782.07	3604.38	4997.05	5254.33	2337.75	954.381

## Sheet: Figure_3
Abb. S3 A	Fibroblasts
	Gene	K	COOH	WHE	Kombi
	COL1A1	1	0.959264	0.938709	0.735858
	MMP2	1	0.982821	2.53151	1.53688
	TIMP1	1	0.918594	1.39354	1.19437
	TIMP2	1	0.851896	1.02901	0.796226
	TIMP3	1	1.66728	0.415379	0.429283
	n=4
	Keratinocytes
		K	COOH	WHE	Kombi
	COL1A1	1	0.860055	0.886535	0.702831
	MMP2	1	0.966774	0.974342	1.45523
	TIMP1	1	1.2581	1.07363	1.29572
	TIMP2	1	0.668964	0.524858	0.534959
	TIMP3	1	1.69643	0.569394	1.10382
	n=4
Abb. 3 C und D	Fibroblasts
	hours	w/o		WHE		COOH (2.5 µM) w/o		COOH (2.5 µM) WHE
		mean	STABWN	mean	STABWN	mean	STABWN	mean	STABWN
	4	38.8653	9.67558	28.3612	1.66991	29.34	2.9521	30.8908	3.36494
	24	5.57425	0.73116	12.239	1.24049	23.3975	7.07838	23.3322	5.9235
	48	2.12225	1.26651	18.3158	8.0075	22.0572	4.55941	30.8023	4.57755
	n=4
	Keratinocytes
	hours	w/o		WHE		COOH (2.5 µM) w/o		COOH (2.5 µM) WHE
		mean	STABWN	mean	STABWN	mean	STABWN	mean	STABWN
	4	45.4171	7.33579	46.1198	4.0732	37.8669	1.94591	33.2835	7.76023
	24	35.6253	4.47728	33.0096	1.4821	29.7848	6.06956	18.4158	2.50296
	48	35.3349	5.02553	26.8957	4.04907	18.222	4.65173	5.65766	3.27557
	n=4

## Sheet: Figure_4
Abb. 4 A	MRC (n=3)
	hours	BNC-unloaded	BNC-PEG400	BNC-COOH
	0 h	100	100	100
	2 h	82, 90 ± 0,87	99,87 ± 0,49	99,01 ± 0,79
	4 h	70,16 ± 1,46	99,73 ± 0,21	99,29 ± 1,10
	6 h	49,31 ± 2,53	99,41 ± 0,45	98,60 ± 1,00
	8 h	31,58 ± 3,36	99,33 ± 0,60	98,01 ± 1,26
	24 h	1,22 ± 0,13	94,55 ± 0,69	92,81 ± 1,99
Abb. 4 B-D	BNC
	Animal-ID	61324	61325	61326	61334	mean	SD	SE
	day 0	100	100	100	100	100	0	0
	day 1	62.0253	93.7063	91.8919	89.9281	84.3879	14.988	7.494
	day 2	54.4304	85.3147	58.7838	55.3957	63.4811	14.6749	7.33746
	day 3	59.4937	78.3217	52.7027	61.8705	63.0971	10.8677	5.43385
	day 4	59.4937	69.2308	50.6757	60.4317	59.9579	7.58476	3.79238
	day 5	56.962	68.5315	46.6216	46.0432	54.5396	10.5913	5.29563
	day 6	41.1392	55.2448	33.1081	33.0935	40.6464	10.4439	5.22196
	day 7	34.1772	48.951	0	0	20.7821	24.7434	12.3717
	day 8	0	0	0	0	0	0	0
	day 9	0	0	0	0	0	0	0
	day 10	0	0	0	0	0	0	0
	BNC-PEG400									PEG400
	Animal-ID	61327	61332	61335	61336	mean	SD	SE		Animal-ID	60446	60449	60450	60451	61333	61337	61338	61324	mean	SD	SE
	day 0	100	100	100	100	100	0	0		day 0	100	100	100	100	100	100	100	100	100	0	0
	day 1	100	100	107.383	52.8169	90.0499	25.0648	12.5324		day 1	88.0952	101.587	66.6667	67.3913	78.7671	75.974	91.2409	77.4834	80.9007	12.0251	4.25153
	day 2	62.5899	89.6825	104.698	71.831	82.2004	18.7458	9.37292		day 2	92.8571	95.2381	75	63.7681	76.7123	75.974	86.8613	71.5232	79.7418	10.8982	3.8531
	day 3	79.8561	67.4603	92.6174	66.9014	76.7088	12.1752	6.08762		day 3	90.4762	91.2698	70.4545	57.2464	69.1781	72.0779	79.562	80.1325	76.2997	11.4402	4.04472
	day 4	71.9424	51.3492	80.5369	57.0423	65.2177	13.4049	6.70245		day 4	86.5079	85.7143	69.697	44.9275	73.9726	71.4286	90.5109	82.1192	75.6098	14.5495	5.14402
	day 5	71.223	50	75.1678	47.1831	60.8935	14.3422	7.17111		day 5	82.5397	71.4286	70.4545	43.4783	69.1781	69.4805	90.5109	85.4305	72.8126	14.4388	5.10488
	day 6	72.6619	47.619	73.1544	0	48.3588	34.3733	17.1867		day 6	80.1587	69.0476	59.8485	44.2029	61.6438	51.2987	89.781	78.1457	66.7659	15.4281	5.45465
	day 7	74.8201	42.0635	69.1275	0	46.5028	34.1368	17.0684		day 7	69.8413	68.254	55.303	31.8841	59.589	69.4805	86.8613	67.5497	63.5954	15.7784	5.57851
	day 8	0	0	63.7584	0	15.9396	31.8792	15.9396		day 8	64.2857	58.7302	40.9091	0	55.4795	57.7922	83.9416	62.2517	52.9237	24.4582	8.64729
	day 9	0	0	59.0604	0	14.7651	29.5302	14.7651		day 9	40.4762	57.1429	37.1212	0	0	42.2078	74.4526	40.3974	36.4747	25.6208	9.05833
	day 10	0	0	46.3087	0	11.5772	23.1544	11.5772		day 10	0	34.127	0	0	0	25.974	63.5036	0	15.4506	23.7915	8.41157
	BNC-COOH									COOH (5 µM)
	Animal-ID	61327	61332	61335	61336	mean	SD	SE		Animal-ID	60446	60499	60450	60451	60133	61337	61338	61324	mean	SD	SE
	day 0	100	100	100	100	100	0	0		day 0	100	100	100	100	100	100	100	100	100	0	0
	day 1	113.043	129.412	84.375	83.3333	102.541	22.5926	11.2963		day 1	99.5305	82.2695	63.9175	78.0488	88.5496	86.4	76	65.3333	80.0062	11.9176	4.21352
	day 2	61.5942	86.5546	57.0313	67.1875	68.0919	12.9904	6.49518		day 2	94.8357	69.5035	68.0412	78.0488	92.3664	77.6	70.6667	67.3333	77.2995	10.8562	3.83823
	day 3	68.8406	85.7143	50	67.7083	68.0658	14.5896	7.29481		day 3	58.216	63.8298	67.354	72.3577	83.9695	67.2	60.6667	68	67.6992	7.93944	2.80702
	day 4	66.6667	52.1008	42.1875	68.2292	57.296	12.4177	6.20886		day 4	89.2019	39.7163	64.6048	68.2927	84.7328	57.6	63.3333	56	65.4352	15.8673	5.60994
	day 5	58.6957	52.1008	21.0938	60.9375	48.2069	18.4605	9.23024		day 5	75.1174	55.3191	57.0447	63.4146	66.4122	51.2	62.6667	54.6667	60.7302	7.75229	2.74085
	day 6	53.6232	43.6975	0	57.8125	38.7833	26.5244	13.2622		day 6	69.4836	46.8085	46.7354	65.8537	74.8092	42.4	52.6667	46.6667	55.678	12.4519	4.40242
	day 7	49.2754	44.5378	0	56.7708	37.646	25.5977	12.7988		day 7	61.9718	41.844	44.6735	50.4065	64.1221	0	0	0	32.8772	28.2648	9.99313
	day 8	44.9275	0	0	36.4583	20.3465	23.7471	11.8736		day 8	59.1549	38.2979	27.4914	43.9024	61.8321	0	0	0	28.8348	26.243	9.27829
	day 9	0	0	0	26.5625	6.64062	13.2812	6.64062		day 9	0	0	0	0	37.4046	0	0	0	4.67557	13.2245	4.67557
	day 10	0	0	0	25	6.25	12.5	6.25		day 10	0	0	0	0	0	0	0	0	0	0	0
Abb. 4 E	BNC-PEG400
	wound	Animal-ID	%
	left	332	185.738
	left	327	n.d.
	left	335	60.906
	left	336	53.3557
		mean	100
		SD	74.3474
		SE	42.9245
	BNC-COOH
	wound	Animal-ID	%
	right	332	63.4228
	right	327	n.d.
	right	335	185.235
	right	336	183.473
		mean	144.044
		SD	69.8252
		SE	40.3136
Abb. 4 F	BNC-PEG400
	wound	Animal-ID	%
	left	332	56.7568
	left	327	133.205
	left	335	110.039
	left	336	n.d.
		mean	100
		SD	39.2001
		SE	22.6322
	BNC-COOH
	wound	Animal-ID	%
	right	332	n.d.
	right	327	90.3475
	right	335	32.4324
	right	336	42.8571
		mean	55.2124
		SD	30.8711
		SE	17.8235
Abb. 4 G	BNC-PEG400
	wound	Animal-ID	%
	left	332	113.98
	left	327	120.84
	left	335	65.1799
	left	336	n.d.
		mean	100
		SD	30.3496
		SE	17.5223
	BNC-COOH
	wound	Animal-ID	%
	right	332	n.d.
	right	327	90.6013
	right	335	107.006
	right	336	89.752
		mean	95.7863
		SD	9.7254
		SE	5.61497

## Sheet: Figure_5
Abb. 5 B	PEG400											COOH
	Animal-ID	71570	71576	71577	71579	71581	71583	mean	SD	SE		Animal-ID	71570	71576	71577	71579	71581	71583	mean	SD	SE
	day 0	100	100	100	100	100	100	100	0	0		day 0	100	100	100	100	100	100	100	0	0
	day 1	83.7398	94.0397	91.2409	91.2752	88.5906	81.1688	88.3425	4.94302	1.64767		day 1	68.1034	75.6757	77.6786	75.2	91.8182	91.1111	79.9312	9.50531	3.16844
	day 2	82.1138	91.3907	88.3212	90.604	86.5772	77.2727	86.0466	5.42647	1.80882		day 2	65.5172	71.6216	66.9643	72	84.5455	89.6296	75.0464	9.79834	3.26611
	day 3	78.8618	86.0927	89.0511	75.8389	83.8926	70.1299	80.6445	7.03894	2.34631		day 3	59.4828	70.9459	66.9643	59.2	82.7273	83.7037	70.504	10.8223	3.60744
	day 4	76.4228	89.404	85.4015	85.2349	75.8389	64.9351	79.5395	8.95328	2.98443		day 4	58.6207	70.2703	55.3571	60	83.6364	73.3333	66.8696	10.7911	3.59704
	day 5	72.3577	64.9007	83.2117	85.906	75.8389	64.9351	74.525	8.89949	2.9665		day 5	50.8621	66.8919	48.2143	57.6	80	75.5556	63.1873	13.0896	4.36319
	day 6	65.0407	60.2649	70.073	87.2483	73.8255	61.6883	69.6901	10.0002	3.3334		day 6	37.069	50.6757	48.2143	49.6	76.3636	73.3333	55.876	15.5135	5.17116
	day 7	65.8537	47.0199	58.3942	75.8389	67.7852	42.2078	59.5166	12.8994	4.29979		day 7	0	0	43.75	0	56.3636	0	16.6856	26.1552	8.71839
	day 8	55.2846	35.0993	49.635	64.4295	69.7987	0	45.7079	25.4549	8.48496		day 8	0	0	0	0	48.1818	0	8.0303	19.6701	6.55671
	day 9	47.9675	0	39.4161	62.4161	72.4832	0	37.0471	30.8841	10.2947		day 9	0	0	0	0	54.5455	0	9.09091	22.2681	7.4227
	day 10	38.2114	0	0	55.0336	71.8121	0	27.5095	31.9535	10.6512		day 10	0	0	0	0	44.5455	0	7.42424	18.1856	6.06187
Abb. 5 C	BNC-PEG400														BNC-COOH
	Animal-ID	71568	71571	71573	71575	71572	71574	71578	71580	71582	mean	SD	SE		Animal-ID	71572	71574	71578	71580	71582	mean	SD	SE
	day 0	100	100	100	100	100	100	100	100	100	100	5.0243e-15	1.67477e-15		day 0	100	100	100	100	100	100	0	0
	day 1	85.1613	103.279	90.3846	106.061	80.5882	108.73	98.5294	95.8904	86.5497	95.0192	9.93633	3.31211		day 1	87.2	92.437	97.561	76	82.0106	87.0417	8.47084	3.78827
	day 2	82.5806	108.197	85.8974	106.818	80.5882	107.937	99.2647	100	81.8713	94.7949	11.9433	3.98111		day 2	82.4	91.5966	92.6829	80	76.1905	84.574	7.26298	3.2481
	day 3	83.2258	96.7213	86.5385	106.061	79.4118	113.492	80.1471	89.726	63.7427	88.7851	14.9929	4.99763		day 3	73.6	84.0336	81.3008	60.8	73.0159	74.5501	9.05305	4.04865
	day 4	84.5161	95.9016	77.5641	104.545	71.7647	115.079	83.8235	78.0822	67.8363	86.5682	15.6447	5.21488		day 4	69.6	82.3529	67.4797	57.6	64.0212	68.2108	9.11875	4.07803
	day 5	80	100	71.1538	78.7879	76.4706	107.937	75	84.2466	57.8947	81.2767	14.9568	4.98558		day 5	68	67.2269	69.9187	39.2	51.8519	59.2395	13.3299	5.96133
	day 6	75.4839	95.082	69.8718	71.2121	67.6471	109.524	81.6176	58.9041	55.5556	76.0998	17.1763	5.72543		day 6	60	49.5798	56.0976	24	21.164	42.1683	18.2906	8.17983
	day 7	77.4194	92.623	69.8718	69.697	71.1765	106.349	74.2647	57.5342	50.2924	74.3587	16.8841	5.62804		day 7	32	0	47.9675	0	0	15.9935	22.6159	10.1141
	day 8	75.4839	72.9508	59.6154	62.1212	68.2353	106.349	44.1176	58.9041	48.538	66.2573	18.2368	6.07892		day 8	0	0	0	0	0	0	0	0
	day 9	77.4194	73.7705	59.6154	46.2121	54.1176	102.381	44.1176	58.9041	24.5614	60.1221	22.4256	7.47521		day 9	0	0	0	0	0	0	0	0
	day 10	77.4194	89.3443	49.359	22.7273	30.5882	97.619	22.0588	65.7534	23.9766	53.2051	30.2118	10.0706		day 10	0	0	0	0	0	0	0	0
Abb. 5 D	PEG400
	wound	Animal-ID	%
	left	570	76.3158
	left	576	78.9474
	left	577	244.737
	left	579	0
	left	581	67.5439
	left	583	132.456
		mean	100
		SD	82.5345
		SE	33.6946
	COOH
	wound	Animal-ID	%
	right	570	51.7544
	right	576	87.7193
	right	577	98.2456
	right	579	116.667
	right	581	37.7193
	right	583	71.0526
		mean	77.193
		SD	29.5133
		SE	12.0488
Abb. 5 E	PEG400
	wound	Animal-ID	%
	left	568	0
	left	571	0
	left	572	123.849
	left	573	207.531
	left	574	0
	left	575	228.731
	left	580	87.0293
	left	582	152.859
		mean	100
		SD	93.8584
		SE	38.3175
	COOH
	wound	Animal-ID	%
	right	572	117.155
	right	574	92.6081
	right	580	92.6081
	right	582	90.3766
		mean	98.1869
		SD	12.689
		SE	5.18025

## Sheet: Figure_S1
Abbb. S1 A	Vehikel				ohne Behandlung				OH (1 µM)				COOH (1 µM)				GA (1 µM)
	wound	Tier-ID	%		wound	Tier-ID	%		wound	Tier-ID	%		wound	Tier-ID	%		wound	Tier-ID	%
	right	433			left	433	84.7867		right	434	113.782		right	443	89.251		right	453	232.261
	left	434	182.155		right	447	94.55		right	436	206.164		right	444	54.2813		right	454	80.3781
	left	436	141.966		right	462	64.2323		right	437	199.901		right	445	n.d.		right	458	46.4522
	left	437	143.532		right	452	147.477		right	438	35.4916		right	448	26.0968		right	496	73.071
	left	438	93.4264		right	334	57.5522			mean	138.835			mean	56.543			mean	108.041
	left	439	138.313		right	324	51.3859			SD	80.7669			SD	31.6378			SD	84.0872
	left	440	47.4961		right	325	39.5671			SE	40.3834			SE	18.2661			SE	42.0436
	left	441	33.4039		right	326	107.396
	left	442	183.721			mean	80.8685
	left	443	21.9213			SD	35.332
	left	444	94.9922			SE	12.4918
	left	445	81.4219
	left	446	83.5097
	left	447	153.971
	left	448	n.d.
	left	449	63.6761
	left	450	67.3297
	left	451	32.8819
	left	452	228.608
	left	453	216.603
	left	454	156.059
	left	458	113.26
	left	459	67.3297
	left	460	n.d.
	left	461	33.9258
	left	462	163.888
	left	463	121.611
	left	464	31.8381
	left	496	100.734
	left	497	94.9922
	left	498	89.7729
	left	499	64.72
	left	501	21.9213
	left	502	181.112
	left	503	56.369
	left	504	45.4084
	left	333	94.4703
	left	337	70.9832
	left	338	69.9393
	left	339	112.738
		mean	100
		SD	55.6816
		SE	9.69292
Abbb. S1 B	Vehikel				ohne Behandlung				OH (1 µM)				COOH (1 µM)				GA (1 µM)
	wound	Tier-ID	%		wound	Tier-ID	%		wound	Tier-ID	%		wound	Tier-ID	%		wound	Tier-ID	%
	right	433	63.6831		left	433	63.6831		right	434	209.245		right	443	n.d.		right	453	137.677
	left	434	149.201		right	447	128.579		right	436	0		right	444	84.9109		right	454	107.958
	left	436	322.055		right	462	84.3044		right	437	151.627		right	445	139.496		right	458	92.1889
	left	437	75.2068		right	452	67.9287		right	438	177.706		right	448	137.07		right	496	110.384
	left	438	n.d.		right	334	111.597			mean	134.644			mean	120.493			mean	112.052
	left	439	70.3547		right	324	124.94			SD	92.8027			SD	30.8385			SD	18.892
	left	440	0		right	325	146.168			SE	46.4014			SE	17.8046			SE	9.44598
	left	441	97.041		right	326	101.287
	left	442	0			mean	103.561
	left	443	156.479			SD	29.7581
	left	444	78.2393			SE	10.5211
	left	445	n.d.
	left	446	n.d.
	left	447	0
	left	448	n.d.
	left	449	0
	left	450	263.224
	left	451	0
	left	452	97.6475
	left	453	93.4019
	left	454	149.201
	left	458	n.d.
	left	459	107.958
	left	460	n.d.
	left	461	86.7304
	left	462	115.843
	left	463	110.384
	left	464	150.414
	left	496	191.049
	left	497	36.3904
	left	498	91.5824
	left	499	36.3904
	left	501	141.316
	left	502	41.8489
	left	503	n.d.
	left	504	162.544
	left	333	77.0263
	left	337	138.89
	left	338	0
	left	339	195.901
		mean	100
		SD	76.4763
		SE	13.3128
Abbb. S1 C	Vehikel				ohne Behandlung				OH (1 µM)				COOH (1 µM)				GA (1 µM)
	wound	Tier-ID	%		wound	Tier-ID	%		wound	Tier-ID	%		wound	Tier-ID	%		wound	Tier-ID	%
	right	433	205.264		left	433	155.948		right	434	146.359		right	443	85.6587		right	453	56.3876
	left	434	194.085		right	447	287.204		right	436	76.1025		right	444	93.5668		right	454	52.0483
	left	436	190.618		right	462	64.023		right	437	55.864		right	445	n.d.		right	458	35.5214
	left	437	128.234		right	452	76.7818		right	438	37.6139		right	448	73.2924		right	496	81.7368
	left	438	n.d.		right	334	64.4914			mean	78.9848			mean	83.4296			mean	56.4235
	left	439	275.973		right	324	44.7049			SD	47.5874			SD	14.3362			SD	19.1207
	left	440	98.5902		right	325	100.595			SE	23.7937			SE	8.277			SE	9.56036
	left	441	73.9916		right	326	141.331
	left	442	200.371			mean	116.885
	left	443	62.6974			SD	79.0615
	left	444	52.7838			SE	27.9524
	left	445	48.3505
	left	446	89.0508
	left	447	148.591
	left	448	n.d.
	left	449	71.3142
	left	450	53.0441
	left	451	n.d.
	left	452	70.5871
	left	453	40.6007
	left	454	102.94
	left	458	32.9794
	left	459	64.876
	left	460	114.843
	left	461	44.798
	left	462	95.185
	left	463	30.7568
	left	464	216.985
	left	496	66.6697
	left	497	137.598
	left	498	51.1386
	left	499	224.026
	left	501	68.9007
	left	502	62.9155
	left	503	55.819
	left	504	73.384
	left	333	117.447
	left	337	38.1377
	left	338	67.2775
	left	339	29.1769
		mean	100
		SD	64.522
		SE	11.2318

## Sheet: Figure_S3
Abb. S3 A	FAV (n=3)
	BNC-unloaded	BNC-PEG400	BNC-COOH
	8881,95 ± 166,68	199,95 ± 8,56	203,71 ± 7,53
Abb. S3 B	FRV (n=3)
	BNC-unloaded	BNC-PEG400	BNC-COOH
	973,43 ± 139,51	151,86 ± 66,24	196,6 ± 57,72
Abb. S3 C	Trancparency (n=3)
	BNC-unloaded	BNC-PEG400	BNC-COOH
	330,2 ± 1,38	90,03 ± 6,11	72,12 ± 6,73
Abb. S3 E	Compressive strain(n=3)
	BNC-unloaded	BNC-PEG400	BNC-COOH
	58,47 ± 8,91	30,93 ± 6,24	35,49 ± 5,89

## Sheet: Figure_S4
Abb. S4 A	Glucose in mmol/ L
	Animal-ID	71568	71569	71570	71571	71572	71573	71574	71575	71576	71577	71578	71579	71580	71581	71582	71583	mean	SD	SE
	day 0	7.881	7.4925	7.659	6.993	9.879	7.2705	6.4935	6.8265	7.326	7.8255	8.0475	7.0485	8.0475	7.9365	7.3815	6.8265	7.55841	0.781012	0.195253
	day 2	22.866	19.9245	7.6035	22.2555	7.6035	6.66	5.439	6.993	6.882	8.658	6.6045	9.768	11.2665	9.7125	6.7155	11.3775	10.6456	5.75919	1.4398
	day 4	21.756	20.202	17.8155	24.198	7.2705	8.7135	11.988	7.77	6.771	8.2695	7.8255	10.545	11.1555	12.543	6.882	15.318	12.4389	5.72746	1.43186
	day 6	24.4755	21.645	22.755	24.42	7.6035	8.547	17.3715	9.2685	6.327	7.326	7.548	12.9315	9.546	15.4845	6.4935	20.646	13.8993	6.95891	1.73973
	day 8	29.2485	26.4735	27.306	26.3625	7.992	9.0465	22.8105	8.2695	8.214	8.103	7.3815	11.2665	13.3755	18.87	7.0485	21.867	15.8522	8.51682	2.1292
	day 10	28.305	22.5885	21.312	23.976	11.1	10.1565	25.197	9.6015	6.7155	7.881	6.993	13.986	10.767	21.201	6.882	27.306	15.873	8.05307	2.01327
	day 12	27.306	28.416	27.4725	30.081	8.8245	17.2605	26.64	10.9335	6.882	7.992	9.2685	21.867	13.2645	22.866	7.1595	25.086	18.2075	8.82496	2.20624
	day 14	31.3575	33.3	32.2455	32.1345	11.3775	22.3665	29.3595	12.321	9.657	8.1585	8.214	27.3615	13.986	30.303	7.1595	24.42	20.8576	10.279	2.56975
Abb. S4 B	Body weight in g	male
	Animal-ID	71568	71569	71570	71571	71572	71577	71578	71579	71580	71581	mean	SD	SE
	day 0	25.2	25	25.6	25.5	24.2	25.7	23.8	24.2	24.2	24.4	24.78	0.697296	0.220504
	day 2	24.5	23.8	24.8	24.5	24.5	25.9	24.4	24.3	23.5	24.1	24.43	0.641266	0.202786
	day 4	23.9	23.7	24.5	23.9	24.8	25.4	24.4	24.6	23.6	23.7	24.25	0.587367	0.185742
	day 6	23.5	23.2	24.5	23.1	24.8	25.5	24.4	24.4	24	23.9	24.13	0.745431	0.235726
	day 8	24.8	21.9	24.7	22.7	24.5	25.6	24	24.4	24.3	23.2	24.01	1.10197	0.348473
	day 10	24.3	21.8	20.9	23.8	23.9	25.3	24.2	24.3	23.9	23.7	23.61	1.29052	0.408099
	day 12	23.5	21.4	23.5	22.4	24.6	26	24.3	24.1	24.5	23.2	23.75	1.27126	0.402009
	day 14	21.5	20.6	22.3	21.4	24.5	25.2	24.2	24.3	24.2	23.4	23.16	1.58549	0.501376
	Body weight in g	female
	Animal-ID	71573	71574	71575	71576	71582	71583	mean	SD	SE
	day 0	21.5	20.8	19.8	20.9	20	20.8	20.6333	0.628225	0.157056
	day 2	20.6	18.9	19.5	20.5	19.5	19.8	19.8	0.651153	0.162788
	day 4	20.8	18.9	19.4	20.9	20.3	20.1	20.0667	0.786554	0.196638
	day 6	21	18.9	19.9	21.1	20.4	20.4	20.2833	0.808497	0.202124
	day 8	21.3	19.7	20.6	20.8	19	20.9	20.3833	0.861201	0.2153
	day 10	20.7	19.6	19.9	21.2	19.7	20.3	20.2333	0.625033	0.156258
	day 12	21.4	18.5	20.5	20.9	19.7	19.2	20.0333	1.09484	0.273709
	day 14	21.3	18.8	20	20.9	19.5	19.1	19.9333	0.99733	0.249332

## Sheet: Legend_Abbreviations
Legend	Explenation
n.d.	not determined
	due to the small size of the wound histological material was limited. In some cases tissue sections did not contain the full wound or were otherwise of poor quality that would bias the quantification.
mean	mean
SD	Standard Deviation
SE	Standard Error
Animal-ID	internal identifier for the animal
µM	cocnentration in µmol per Liter
FRV	fluid retention value
FAV	fluid absorption value
GA	Garcinoic acid
OH	α-13’-hydroxychromanol
COOH	α-13’-carboxychromanol
PEG400	Polyethylen glycol 400
BNC	biocompatible nanocellulose
wound	specifies the position of the wound on the mouse's back (left or right)
